# Supplementary material for: Social network integration and analysis using a generalization and probabilistic approach for privacy preservation
Source: Springer Nature journal article supplement (doi:10.1186/2190-8532-1-7), 2012-07-12
Supplement: 13388_2011_15_MOESM5_ESM.pdf [file 13388_2011_15_MOESM5_ESM.pdf]

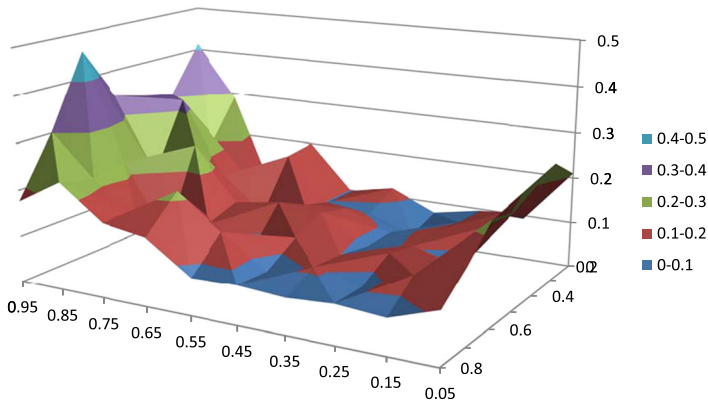

(a)

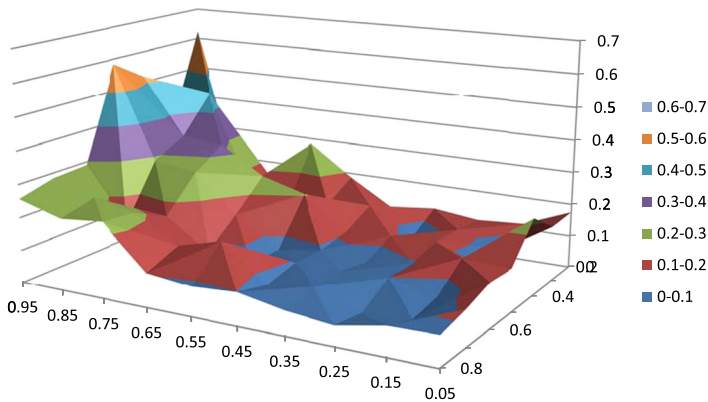

(b)
